# Supplementary material
Source: PubMed Central journal article supplement (PMC7458973)
Supplement: 11606_2020_5946_MOESM1_ESM.pdf [file 11606_2020_5946_MOESM1_ESM.pdf]

**Supplement:**

| <b>Supplement Table 1 - Thirty and ninety-day readmission rates (adjusted analysis)<sup>a</sup></b> |            |                              |                       |                              |                       |                              |                       |                              |                       |
|-----------------------------------------------------------------------------------------------------|------------|------------------------------|-----------------------|------------------------------|-----------------------|------------------------------|-----------------------|------------------------------|-----------------------|
|                                                                                                     |            | <b>Florida</b>               |                       | <b>Massachusetts</b>         |                       | <b>New York</b>              |                       | <b>Combined</b>              |                       |
|                                                                                                     |            | <b>Percentage Readmitted</b> | <b>Standard Error</b> |
| 30-day                                                                                              | Homeless   | 30.4%                        | 0.01%                 | 23.5%                        | 0.01%                 | 15.7%                        | 0.04%                 | 17.3%                        | 0.04%                 |
|                                                                                                     | Housed     | 19.3%                        | 0.003%                | 15.2%                        | 0.003%                | 13.4%                        | 0.02%                 | 14.0%                        | 0.02%                 |
|                                                                                                     | Difference | 11.1%                        | 0.02%                 | 8.3%                         | 0.01%                 | 2.3%                         | 0.04%                 | 3.3%                         | 0.05%                 |
|                                                                                                     |            |                              |                       |                              |                       |                              |                       |                              |                       |
| 90-day                                                                                              | Homeless   | 39.3%                        | 0.02%                 | 35.0%                        | 0.01%                 | 21.9%                        | 0.05%                 | 23.8%                        | 0.1%                  |
|                                                                                                     | Housed     | 26.8%                        | 0.004%                | 23.3%                        | 0.004%                | 19.1%                        | 0.02%                 | 19.9%                        | 0.02%                 |
|                                                                                                     | Difference | 12.5%                        | 0.02%                 | 11.7%                        | 0.01%                 | 2.8%                         | 0.1%                  | 3.9%                         | 0.1%                  |

<sup>a</sup> Adjusted for age, demographics, gender, race/ethnicity, state, cause of index hospitalization by clinical classification of diseases (CCS) category, and presence of 22 clinical comorbidities.

All p-values for difference between homeless and housed groups <0.001

**Supplement Table 2 –Readmission rates by homelessness status for most common causes of hospitalization (adjusted analysis)<sup>a</sup>**

|                                                                 |            | Florida               |                | Massachusetts         |                | New York              |                | Combined              |                |
|-----------------------------------------------------------------|------------|-----------------------|----------------|-----------------------|----------------|-----------------------|----------------|-----------------------|----------------|
|                                                                 |            | Percentage Readmitted | Standard Error |
| <b>Mental Illness</b>                                           |            |                       |                |                       |                |                       |                |                       |                |
| 30-day                                                          | Homeless   | 33.6%                 | 0.01%          | 23.1%                 | 0.01%          | 22.6%                 | 0.02%          | 24.6%                 | 0.03%          |
|                                                                 | Housed     | 22.7%                 | 0.003%         | 16.3%                 | 0.003%         | 20.6%                 | 0.01%          | 20.5%                 | 0.01%          |
|                                                                 | Difference | 10.9%                 | 0.012%         | 6.8%                  | 0.01%          | 2.0%                  | 0.02%          | 4.1%                  | 0.03%          |
|                                                                 |            |                       |                |                       |                |                       |                |                       |                |
| 90-day                                                          | Homeless   | 42.8%                 | 0.01%          | 35.8%                 | 0.01%          | 32.1%                 | 0.03%          | 34.2%                 | 0.03%          |
|                                                                 | Housed     | 31.2%                 | 0.003%         | 25.8%                 | 0.003%         | 28.6%                 | 0.01%          | 28.7%                 | 0.01%          |
|                                                                 | Difference | 11.6%                 | 0.013%         | 10.0%                 | 0.01%          | 3.5%                  | 0.03%          | 5.5%                  | 0.03%          |
| <b>Complications of pregnancy childbirth and the puerperium</b> |            |                       |                |                       |                |                       |                |                       |                |
| 30-day                                                          | Homeless   | 6.5%                  | 0.0004%        | 7.3%                  | 0.001%         | 4.5%                  | 0.01%          | 4.5%                  | 0.01%          |
|                                                                 | Housed     | 5.5%                  | 0.00003%       | 4.4%                  | 0.0001%        | 4.7%                  | 0.005%         | 4.7%                  | 0.005%         |
|                                                                 | Difference | 1.0% <sup>c</sup>     | 0.0004%        | 2.9% <sup>b</sup>     | 0.001%         | -0.2%                 | 0.01%          | -0.2% <sup>b</sup>    | 0.01%          |
|                                                                 |            |                       |                |                       |                |                       |                |                       |                |
| 90-day                                                          | Homeless   | 10.5%                 | 0.001%         | 10.3%                 | 0.002%         | 7.1%                  | 0.02%          | 7.1%                  | 0.02%          |

|                                           |            |                   |         |                   |         |       |        |                    |        |
|-------------------------------------------|------------|-------------------|---------|-------------------|---------|-------|--------|--------------------|--------|
|                                           | Housed     | 9.4%              | 0.0001% | 6.5%              | 0.0002% | 7.5%  | 0.01%  | 7.5%               | 0.01%  |
|                                           | Difference | 1.1% <sup>c</sup> | 0.001%  | 3.9% <sup>b</sup> | 0.002%  | -0.4% | 0.02%  | -0.3% <sup>c</sup> | 0.02%  |
| <b>Diseases of the circulatory system</b> |            |                   |         |                   |         |       |        |                    |        |
| 30-day                                    | Homeless   | 30.1%             | 0.004%  | 26.9%             | 0.003%  | 20.4% | 0.02%  | 21.2%              | 0.02%  |
|                                           | Housed     | 16.2%             | 0.001%  | 15.6%             | 0.001%  | 16.3% | 0.01%  | 16.3%              | 0.01%  |
|                                           | Difference | 13.9%             | 0.004%  | 11.3%             | 0.003%  | 4.0%  | 0.02%  | 4.9%               | 0.02%  |
|                                           |            |                   |         |                   |         |       |        |                    |        |
| 90-day                                    | Homeless   | 40.5%             | 0.005%  | 40.1%             | 0.003%  | 28.1% | 0.02%  | 29.2%              | 0.02%  |
|                                           | Housed     | 23.2%             | 0.001%  | 24.0%             | 0.001%  | 23.9% | 0.01%  | 23.8%              | 0.01%  |
|                                           | Difference | 17.3%             | 0.005%  | 16.1%             | 0.003%  | 4.3%  | 0.02%  | 5.3%               | 0.02%  |
| <b>Diseases of the digestive system</b>   |            |                   |         |                   |         |       |        |                    |        |
| 30-day                                    | Homeless   | 25.2%             | 0.003%  | 25.5%             | 0.002%  | 12.5% | 0.01%  | 13.8%              | 0.01%  |
|                                           | Housed     | 14.0%             | 0.001%  | 15.8%             | 0.001%  | 11.1% | 0.004% | 11.5%              | 0.004% |
|                                           | Difference | 11.2%             | 0.003%  | 9.7%              | 0.002%  | 1.4%  | 0.01%  | 2.4%               | 0.01%  |
|                                           |            |                   |         |                   |         |       |        |                    |        |
| 90-day                                    | Homeless   | 34.4%             | 0.003%  | 39.0%             | 0.003%  | 18.7% | 0.01%  | 20.3%              | 0.01%  |
|                                           | Housed     | 20.9%             | 0.001%  | 23.5%             | 0.001%  | 16.8% | 0.005% | 17.3%              | 0.005% |
|                                           | Difference | 13.5%             | 0.003%  | 15.5%             | 0.003%  | 1.9%  | 0.01%  | 3.1%               | 0.01%  |

<sup>a</sup> Adjusted for age, demographics, gender, race/ethnicity, state, cause of index hospitalization by clinical classification of diseases (CCS) category, and presence of 22 clinical comorbidities.

All p-values for difference between homeless and housed groups  $< 0.001$  unless specified otherwise

<sup>b</sup> p-value for difference between homeless and housed groups between 0.05 and 0.001

<sup>c</sup> p-value for difference between homeless and housed groups  $\geq 0.05$
